1 Potential sources of intra-population variation in painted turtle  
2 (*Chrysemys picta*) hatchling overwintering strategy

3

4 **Julia L. Riley<sup>1,2</sup>, Glenn J. Tattersall<sup>3</sup>, and Jacqueline D. Litzgus<sup>1,\*</sup>**

5

6 <sup>1</sup>Department of Biology, Laurentian University, 935 Ramsey Lake Road, Sudbury,  
7 Ontario, P3E 2C6, Canada.

8 <sup>2</sup>Current address: Department of Biological Sciences, Macquarie University, Sydney,  
9 New South Wales, 2109, Australia.

10 <sup>3</sup>Department of Biological Sciences, Brock University, St. Catharines, Ontario, L2S 3A1,  
11 Canada.

12

13 \*Author for correspondence (jlitzgus@laurentian.ca)

## 14 ABSTRACT

15 Many temperate animals spend half their lives in a non-active, overwintering state, and multiple  
16 adaptations have evolved to enable winter survival. One notable vertebrate model is *Chrysemys*  
17 *picta* whose hatchlings display dichotomous overwintering strategies: some hatchlings spend  
18 their first winter aquatically after nest emergence in fall, while others overwinter terrestrially  
19 within their natal nest with subsequent spring emergence. Occurrence of these strategies varies  
20 among populations and temporally within populations; however, factors that determine the  
21 strategy employed by a nest in nature are unknown. We examined potential factors that influence  
22 intra-population variation in *C. picta* hatchling overwintering strategy over two winters in  
23 Algonquin Park, Ontario. We found that environmental factors may be a trigger for hatchling  
24 overwintering strategy: fall-emerging nests were sloped towards the water and were surrounded  
25 by a relatively higher percentage of bare ground compared to spring-emerging nests. Fall-  
26 emerging hatchlings were also relatively smaller. Overwintering strategy was not associated with  
27 clutch oviposition sequence, or mammalian or avian predation attempts. Instead, fall emergence  
28 from the nest was associated with the direct mortality threat of predation by Sarcophagid fly  
29 larvae. Body condition and righting response, measured as proxies of hatchling fitness, did not  
30 differ between overwintering strategies. Costs and benefits of overwintering aquatically versus  
31 terrestrially in hatchling *C. picta* are largely unknown, and have the potential to affect population  
32 dynamics. Understanding winter survival has great implications for turtle ecology, thus we  
33 emphasize future research areas on dichotomous overwintering strategies in temperate hatchling  
34 turtles.

35

36 **KEY WORDS: Body condition, Fitness, Freeze-tolerance, Maternal effects, Nest**  
37 **environment, Nest predators, Supercooling, Temperature**

## 38 INTRODUCTION

39 Factors influencing population dynamics are well-studied in animal ecology and conservation.  
40 Many environmental factors impact population dynamics because they directly influence  
41 reproduction and survival, especially during particular seasons (Aars and Ims, 2002). For  
42 temperate animals, winter is a severe energetic challenge that greatly influences both survival  
43 and the subsequent year's reproductive output (Sendor and Simon, 2003). Winter adaptations  
44 include behavioural means of avoiding low temperatures (e.g., migration, habitat selection), and  
45 physiological changes that permit survival at low temperatures (e.g., biochemical adjustments,  
46 reduced metabolic rate; Marchand, 2013). Many species combine adaptations for an  
47 overwintering strategy that effectively promotes winter survival. Juvenile life-stages experience  
48 lower survival, particularly within the first year of life, than adults; this trend is consistent across  
49 juvenile endotherms (small mammals, Muchlinski, 1998; Sendor and Simon, 2003; birds, Peach  
50 et al., 2003; rodents, Marchand, 2013) and ectotherms (salmonids, Huusko et al., 2007;  
51 amphibians, Tester and Breckenridge, 1964; Resetarits, 1986; McCafferya and Maxellb, 2010;  
52 snakes, Viitanen, 1967; Parker and Brown, 1980; Macartney, 1985; Brentcharlan, 1989; turtles,  
53 Ultsch, 2006). Overwintering survival greatly impacts juvenile recruitment and can, in turn,  
54 affect population dynamics. For example, in *Vipera vipera*, winter climate primarily affects  
55 population growth/decline through its effects on juvenile survival (Altwegg et al., 2005). Winter  
56 exerts substantial selection pressures on overwintering strategies that optimize survival.

57 Interestingly, some animals exhibit intraspecific variation in overwintering strategy,  
58 particularly with respect to biochemical adjustments used to survive freezing temperatures. For  
59 example, many invertebrates vary in their ability to tolerate ice formation within body tissues  
60 (i.e., freeze tolerance) and their ability to lower the temperature of cellular fluid below its  
61 freezing point (e.g., supercooling, Baust et al., 1979; Baust and Lee, 1981; Tanaka 1997;  
62 Lombardero et al., 2000). Also, *Hyla versicolor* differs in its capacity for freeze tolerance along a  
63 latitudinal gradient (Costanzo et al., 1992). Many turtles during the hatchling life-stage (the first  
64 year of life) exhibit behavioural and physiological variation in overwintering strategies and can  
65 spend winter in either aquatic or terrestrial sites (Ultsch 2006, Gibbons 2013, Lovich et al. in  
66 press). Hatchlings that overwinter terrestrially either avoid freezing temperatures by burrowing  
67 below the frostline (e.g., *Terrepenne ornata*; Ultsch, 2006), or remain within their nest cavity

68 (above the frostline) and survive by either supercooling or freeze tolerance (e.g., *Chrysemys*  
69 *picta*, *Graptemys geographica*; Costanzo et al., 2008). Although an aquatic environment buffers  
70 turtles from freezing temperatures because of water's high thermal buffering capacity (Costanzo  
71 et al. 1992), overwintering terrestrially within the nest is thought to be the preferred strategy for  
72 turtle hatchlings (Gibbons, 2013; Lovich et al. in press).

73 One field-based question that has yet to be answered is why, within a single turtle  
74 population, is overwintering strategy variable? Two main hypotheses have been proposed to  
75 explain variability in hatchling turtle overwinter strategy; firstly that overwintering in the nest is  
76 a passive response to environmental conditions that hamper fall emergence, and secondly that  
77 overwintering strategy is a plastic response to nest environmental factors and increases offspring  
78 fitness. The first hypothesis stems from the ideas that hatchlings may be (1) unable to emerge in  
79 the fall because they cannot penetrate encrusted overlying soil, (2) clutches laid later in the  
80 season may not emerge because they require additional developmental time, and/or (3) fall  
81 emergence is prevented by the cool weather that reduces mobility of hatchlings (Obbard and  
82 Brooks, 1981; Tinkle et al., 1981; DePari, 1996; Blouin-Demers et al., 2000; Parren and Rice,  
83 2004). The second hypothesis asserts that in-nest overwintering confers benefits that increase  
84 survival. Larger hatchling size confers greater overwintering survival (Mitchell et al., 2014),  
85 perhaps because larger hatchlings have more liver and carcass mass, the tissues used by  
86 hatchlings to support energetic costs of overwintering (Muir et al., 2013). In contrast, Costanzo  
87 et al. (2004) theorized that smaller hatchlings might supercool more readily, and thus survive  
88 lower sub-freezing temperatures, because the likelihood of lethal freezing increases with fluid  
89 volume. Nest environment also affects hatchling overwinter survival; for example, winter  
90 mortality is greatest when temperatures are lowest and soil moisture is highest (Storey et al.,  
91 1988; Costanzo et al., 2000, 2001, 2004). Fall emergence could be to avoid a direct mortality  
92 threat; for instance, nest infestation by Sarcophagid fly larvae may stimulate emergence  
93 (Warkentin, 1995; Bolton et al., 2008; Spencer and Janzen, 2011). Finally, overwintering in-nest  
94 may provide hatchlings with additional time to develop in a lower risk environment (Costanzo et  
95 al., 2008).

96 The purpose of our study was to elucidate why overwintering strategy used by hatchlings  
97 varies within a population using the model species, *C. picta*. Generally, a clutch of eggs is

98 oviposited in the spring or summer, and the eggs hatch 89-99 days later (Ernst and Lovich,  
99 2009). *C. picta* hatchlings may emerge from the nest in the fall and are assumed to move to  
100 aquatic sites, or they remain in the nest throughout the winter and emerge the following spring  
101 (Hartweg, 1944; Cagle, 1954; Woolverton, 1961; Gibbons and Nelson 1978; Churchill and  
102 Storey, 1992; Costanzo et al., 2008). The relative frequency of these two overwintering strategies  
103 varies temporally and geographically (Costanzo et al., 2008; Gibbons, 2013; Lovich et al., in  
104 press), but fall emergence and subsequent assumed aquatic overwintering has been documented  
105 throughout the range of *C. picta* (Finneran, 1948; Ernst, 1971; Christiansen and Gallaway, 1984;  
106 St. Clair and Gregory, 1990; DePari 1996; Rozycki, 1998; Waye and Gillies, 1999; Pappas et al.,  
107 2000; Costanzo et al., 2004; Carroll and Ultsch, 2007). In order to examine variation in  
108 overwintering strategy, our study had multiple objectives:

- 109 1) To explore if variation in overwintering strategy can be explained by nest environmental  
110 factors, concentrating on factors that have been highlighted in previous studies: heat units  
111 accumulated over incubation (Storey et al., 1988), vegetative cover, nest oxygen  
112 availability (Costanzo et al., 2001; Rafferty and Reina, 2012), oviposition date, and soil  
113 moisture (Costanzo et al., 2000, 2001), organic content (Costanzo et al., 1998) and texture  
114 qualities (Packard and Packard, 1997; Costanzo et al., 1998).
- 115 2) To determine if overwintering strategy benefitted hatchlings. We tested whether  
116 mammalian/avian predators or predatory Sarcophagid fly (*Tripanurga importuna*) larvae  
117 triggered hatchlings to emerge. We compared body size of hatchlings before overwintering  
118 to determine if hatchling size differed between strategies. Also, we compared proxies for  
119 hatchling fitness (body condition and righting response) prior to overwintering between  
120 strategies to determine if hatchlings that stayed in-nest would benefit from a longer  
121 developmental time.
- 122 3) To examine risks associated with overwintering aquatically versus terrestrially by  
123 comparing winter temperature and available oxygen between marshes and nests. We  
124 predicted that winter temperatures in marshes would be higher than in nests, but that winter  
125 oxygen would be higher in nests than in marshes.

126 4) Finally, we undertook a preliminary investigation of maternal influence on overwintering  
127 strategy by examining whether the strategy was the same between multiple clutches from  
128 the same female (Friebele and Swarth, 2005).

129

## 130 RESULTS

### 131 **Observational data**

132 In 2010-11, 2 nests emerged in fall and 23 overwintered in-nest (5 were excavated in fall). In  
133 2011-12, 16 nests emerged in fall and 20 overwintered in-nest (6 were excavated in fall). Mean  
134 hatching success differed significantly between fall and spring-emerging clutches ( $W_1=322$ ,  
135  $P=0.02$ ), with higher hatching success in fall ( $84 \pm 5\%$ ) compared to spring-emerging clutches  
136 ( $61 \pm 6\%$ ). Overwintering success of hatched individuals in spring-emerging clutches was  $67 \pm$   
137  $8\%$ .

138 We found that of hatchlings tracked post-emergence, 45% (38/85) reached water within 24  
139 hours post-release. The other turtles moved towards grass and woody brush piles away from the  
140 nearest water body (43%), and 12% were not found.

141 Hatchlings emerged from nests that accumulated more heat units ( $^{\circ}\text{D}$ ) over incubation than  
142 nests wherein hatchlings remained (Table 1). Hatchlings emerged from nests that were warmer  
143 over winter compared to nests in which hatchlings remained (Table 2;  $t_{17}=2.11$ ,  $P<0.01$ ). The  
144 lowest winter temperature within a nest was  $-4.9^{\circ}\text{C}$  (Table 2). Nests from which hatchlings  
145 emerged in fall spent on average  $500 \pm 142$  hours below  $-0.6^{\circ}\text{C}$  (freezing point of body fluids)  
146 and  $28 \pm 21$  hours below  $-4^{\circ}\text{C}$  (limit of freeze-tolerance). Nests in which hatchlings overwintered  
147 spent on average  $940 \pm 185$  hours below  $-0.6^{\circ}\text{C}$  and  $11 \pm 6$  hours below  $-4^{\circ}\text{C}$ . The first principal  
148 component for soil characteristics did not differ between fall and spring emerging nests  
149 ( $t_{32}=1.74$ ,  $P=0.09$ ). The nests contained low organic content (mean =  $2.1 \pm 0.3\%$ ), and consisted  
150 of predominately sandy soil (means:  $22 \pm 2\%$  gravel,  $13 \pm 1\%$  coarse sand,  $39 \pm 2\%$  sand, and  $17$   
151  $\pm 1\%$  fines).

152

### 153 **Nest environment and overwinter strategy**

154 The model that had the lowest  $\text{AIC}_c$  score (30.36) included the two environmental variables: nest  
155 slope and bare ground  $1 \text{ m}^2$  around the nest ( $R^2_{\text{N}}=0.41$ ; Table 3). Hatchling painted turtles were

156 more likely to emerge from nests surrounded by bare ground ( $\beta=-0.51$ ,  $LCL=-1.21$ ,  $UCL=0.03$ )  
157 and sloped towards water ( $\beta=-0.17$ ,  $LCL=-0.39$ ,  $UCL=-0.03$ ).

158 Overwintering strategy did not differ significantly between first and second clutches  
159 ( $P=0.59$ ). Thirty percent of first clutches emerged in the fall and 70% overwintered in the nest,  
160 and similarly 20% of second clutches emerged in fall and 80% overwintered in-nest.

161

## 162 **Potential benefits to hatchlings**

163 The number of mammalian/avian predation attempts did not affect overwinter strategy ( $P=0.95$ ).  
164 Mean number of predation attempts on a clutch was  $0.3 \pm 0.2$  per nest for fall-emerging nests,  
165 and  $0.3 \pm 0.1$  per nest for clutches that overwintered in-nest. Sarcophagid fly larvae nest  
166 infestation was significantly related to hatchling overwinter strategy ( $P=0.04$ ); 50% of fall-  
167 emerging nests were infested with fly larvae, whereas 23% of spring-emerging nests had  
168 evidence of fly larvae infestation (Table 4).

169 Body condition of hatchlings was not different among those that emerged in the fall, those  
170 that were excavated in the fall but would have overwintered in-nest, and spring-emerging  
171 hatchlings ( $F_{2, 49}=1.52$ ,  $P=0.47$ ). Hatchlings with a smaller carapace length were more likely to  
172 emerge from nests in fall (Wald's z-statistic=2.35,  $P=0.02$ ,  $R^2_N=0.21$ ). In the fall, hatchlings  
173 from nests that emerged had a mean carapace length of  $26.21 \pm 0.25$  mm, and hatchlings that  
174 would have overwintered but were excavated had a carapace length of  $26.66 \pm 0.46$  mm (Fig. 1).  
175 Spring-emerging hatchlings had shorter carapaces (mean =  $25.18 \pm 0.52$  mm) post-overwintering  
176 when compared to hatchlings in the fall pre-overwintering ( $F_{2, 48}=5.83$ ,  $P<0.01$ ; Fig. 1).  
177 Hatchlings with a smaller mass were also more likely to emerge from nests in fall (Wald's z-  
178 statistic=1.94,  $P=0.05$ ,  $R^2_N=0.13$ ). In the fall, hatchlings from emerged nests weighed  $4.58 \pm 0.50$   
179 g, and hatchlings from excavated nests weighed  $4.59 \pm 0.61$  g. Mass was not different between  
180 fall and spring-emerging hatchlings ( $F_{2, 48}=2.59$ ,  $P=0.09$ ); spring-emerging hatchlings had a mean  
181 mass of  $4.24 \pm 0.52$  g.

182 Latency period (LP) of hatchlings did not differ among sampling periods ( $F_{2, 49}=1.80$ ,  
183  $P=0.41$ ). Mean LP of fall-emerging hatchlings was  $110 \pm 31$  s, and of hatchlings that were  
184 excavated in the fall was  $115 \pm 27$  s. Mean LP of spring-emerging hatchlings post-overwintering  
185 was  $121 \pm 27$  s. The second measurement in righting response, righting period (RP), also did not

186 differ among sampling categories ( $F_{2, 49}=0.40, P=0.82$ ). Mean RP of fall-emerging hatchlings  
187 was  $13 \pm 7$  s, of hatchling that were excavated in fall was  $16 \pm 6$  s, and of spring-emerging  
188 hatchlings was  $26 \pm 9$  s.

189

### 190 **Maternal influence on overwintering strategy**

191 From 2010-2012, there were 6 females for which we sampled two clutches during a nesting  
192 season. Out of these 6 double clutches, 4 (67%) exhibited the same overwintering strategy.

193

### 194 **Comparison between aquatic and terrestrial overwintering sites**

195 Winter temperatures differed between putative hibernation sites in marshes and nest cavities  
196 ( $t_{53}=2.01, P<0.01$ ). The lowest marsh temperature ranged from  $-11.9$  to  $2.8^{\circ}\text{C}$ , and mean marsh  
197 temperature was  $3.7 \pm 0.2^{\circ}\text{C}$ . The lowest in-nest temperature ranged from  $-4.9$  to  $-1.7^{\circ}\text{C}$ , and  
198 mean temperature was  $2.4 \pm 0.1^{\circ}\text{C}$ . Dissolved oxygen in marshes ranged from 2.1 to 95% air  
199 saturation from September 2011 until March 2012, and mean dissolved oxygen was  $37 \pm 4\%$  air  
200 saturation. Available oxygen in nests over the same time period ranged from 20.6 to 21.2%, and  
201 mean nest oxygen available during winter was  $21.0 \pm 0.01\%$ .

202

## 203 DISCUSSION

### 204 **Observational findings**

205 Hatching success was higher in fall-emerging nests than in spring-emerging nests, suggesting  
206 that conditions in the nest are not optimal for development and that overwinter strategy may be a  
207 passive response to a subpar nest environment. Winter survival in-nest depends on many factors,  
208 including nest temperature. In our study, nest temperatures fell below  $-4^{\circ}\text{C}$  during winter (in 9  
209 out of 19 nests), and overwintering success of spring-emerging clutches was  $67 \pm 8\%$ .

210 Hatchlings remained overwinter in cooler nests when compared to nests from which  
211 hatchlings emerged. Also, clutches that overwintered in-nest experienced less time below the  
212 temperature limit of freeze-tolerance ( $< -4^{\circ}\text{C}$ ), below which they may have had to employ  
213 supercooling to survive. Due to our field study limitations, the exact physiological mechanism  
214 hatchlings used to survive overwinter in our study is unknown. The four nests in which  
215 hatchlings remained overwinter that fell below  $-4^{\circ}\text{C}$  experienced 0–100% overwintering success.



216 Perhaps hatchlings are remaining in nests that keep them cool with a concomitant reduced  
217 metabolic rate overwinter, while still at temperatures above the limit for freeze tolerance.  
218 Paterson et al. (2012) also found evidence that hatchling *Emydoidea blandingii* and *Glyptemys*  
219 *insculpta* selected overwintering sites with cooler temperatures than random plots. This begs the  
220 question, how might hatchlings in the fall sense the future temperature conditions in their nest?  
221 Are hatchlings using another, closely-related environmental variable to assess future nest  
222 temperatures?

223 Tracking hatchlings post-emergence in the fall revealed that approximately half the  
224 hatchlings successfully reached aquatic sites within 24 hours. The other hatchlings moved  
225 towards grass and woody brush piles away from the nearest water body, and buried themselves  
226 2-5 cm into the leaf litter. It is important to note that we tracked hatchlings for a limited time  
227 period (24 hours), and their movements post-tracking are unknown. Hatchling *C. picta* natural  
228 post-emergence movements have not been previously studied (Ultsch, 2006), and it has been  
229 assumed that all fall-emerging hatchlings move directly towards water (Costanzo et al., 1995).  
230 Our findings suggest there may be more variability in post-emergence movements. Warner and  
231 Mitchell (2013) examined *C. picta* post-emergence movements within a small arena and found  
232 that hatchlings tended to move directly towards water. In contrast, Congdon et al. (2011) found  
233 that naïve hatchling *C. picta* within an arena oriented towards nearby, open, illuminated horizons  
234 regardless of whether the environment was aquatic or not. Post-emergence in the fall, the other  
235 half of tracked hatchlings buried themselves in terrestrial sites. Similarly, terrestrial  
236 overwintering after fall emergence has been observed in *Malaclemys terrapin* (Muldoon and  
237 Burke, 2012), another species with dichotomous hatchling overwintering strategies (Baker et al.,  
238 2006). Interestingly, there was also evidence that fall-emerging hatchlings utilized autumn to  
239 increase their energy reserve: one of the fall-emerging hatchlings was observed actively foraging  
240 in water for aquatic insects less than 7 hours post-emergence. Painted turtle hatchlings may  
241 emerge in the fall to build up needed energy reserves for winter survival. Our findings highlight  
242 that hatchling post-emergence movements and overwintering behaviours remain largely  
243 unknown, even in a well-studied model study species such as *C. picta*.

244

## 245 **Nest environment and overwintering strategy**

246 Our observational findings suggest that nest environmental factors may influence overwintering  
247 strategy, but these findings were not conclusively supported by our statistical modelling. We  
248 found some evidence that overwintering strategy is influenced by vegetation and slope of the  
249 ground surface at the nest; although the effect strength of both environmental variables was  
250 weak; Nagelkerke's R-squared value ( $R^2_N=0.41$ ) suggests that these two variables explain a little  
251 less than half of the variability in overwintering strategy. There were 7 other models within 2  
252 delta  $AIC_c$  of the model with the lowest  $AIC_c$ , and these other models included additional  
253 environmental variables: average percent oxygen, oviposition date, total heat units, and nest soil  
254 principle component 1 (Table 3). Of these 8 models within 2 delta  $AIC_c$  of each other, the one  
255 with the highest  $R^2_N$  included vegetation and slope of the nest, and also oviposition date and the  
256 total heat units accumulated over incubation ( $R^2_N=0.60$ ). Our limited sample size restricts the  
257 conclusions that we can derive from our models because our statistical power was limited. But  
258 overall, the models suggest that environmental variables may affect overwintering strategy in  
259 painted turtles. In contrast, Friebele and Swarth (2005) found that nest environment did not  
260 influence overwintering strategy in *Pseudemys rubriventris* hatchlings; however, they did not  
261 examine the same environmental variables used in our study.

262 As nest slope towards water increased, hatchlings were more likely to emerge in fall. One  
263 explanation for this relationship is that as slope increases it approaches the critical angle of  
264 repose, which is the steepest angle at which a material can be before it collapses (Graf, 1984;  
265 Jaeger et al., 1989). Thus, it would be beneficial for hatchlings to leave nests at steeper slopes  
266 that are unstable and could increase mortality. The angle of repose for sand is  $35^\circ$ , yet the  
267 steepest nest slope in our study was  $22^\circ$  so the risk of collapse was low. Furthermore, turtle nest  
268 collapse appears rare: sea turtle (*Chelonia mydas*) nest collapse, due to sand textural  
269 characteristics, has been reported to cause hatchling mortality (Mann, 1977), and one *Glyptemys*  
270 *insculpta* nest, on a very steep slope, collapsed during incubation (Riley pers. obs.). Nest  
271 collapse may cause hatchlings to emerge from steeply-sloped nests, but it is more likely that  
272 slope is related to other environment factors.

273 Steeper slopes may increase the temperature of nests because of enhanced solar radiation  
274 absorbance (Schwarzkopf and Brooks, 1987; Wood and Bjorndal, 2000). Warmer nests increase  
275 developmental rate and allow hatchlings to complete development by an earlier date. Once

276 development is completed, hatchlings may need to emerge from nests because warm nests might  
277 reach lethally high temperatures, and hatchlings may experience high metabolic rates, causing  
278 them to quickly consuming their yolk reserves and exit nests to forage prior to winter (Muir et  
279 al., 2013). Our models suggest that fall-emerging hatchlings are from nests that accumulated  
280 more heat units over incubation (i.e., spent more time within optimal developmental  
281 temperatures, Holt, 2000). Nest temperatures, stability, and slope of the nest may be inter-related  
282 variables, but how hatchlings can perceive nest slope or future temperature post-hatching while  
283 within the nest remains unknown.

284 Our models also suggest that hatchlings emerge from nests surrounded by bare ground.  
285 Less vegetation above a nest can result in lower temperatures during winter; without plants and  
286 leaf litter to trap an insulating layer of air between the snow and ground, nest temperatures  
287 become colder. Although it is logical to directly relate nest environment to its effects on  
288 hatchlings, environment may also affect presence of organisms that in turn affect hatchlings  
289 (e.g., predatory fly larvae). Sarcophagid flies lay their eggs in sandy areas, and larvae burrow  
290 through sand into a nest (Bolton et al., 2008). Sarcophagid flies may avoid laying eggs in turtle  
291 nests with high levels of vegetation, and our study shows that hatchlings emerge from nests with  
292 Sarcophagid larvae (discussed below). Are environmental factors directly triggering hatchling  
293 response, or indirectly affecting overwintering strategy by altering presence of predatory flies?

294 Nest environment is complex, with many inter-related factors potentially influencing  
295 development of hatchling turtles. More research is required to understand how hatchlings sense  
296 their nest environment. Our discussion about environmental factors that influence overwintering  
297 strategy is mainly speculative because of the weak effect the environmental variables we  
298 measured had on overwintering strategy, yet we hope our discussion inspires avenues of  
299 subsequent research.

300

### 301 **Potential benefits to hatchlings**

302 Fall emergence appears to lower the risk of predation by Sarcophagid fly larvae. Sarcophagid  
303 larvae opportunistically prey upon turtle eggs and hatchlings (Iverson and Perry, 1994; Smith,  
304 2002; Bolton et al., 2008), and fly larvae cause direct mortality of hatchlings (Gillingwater,  
305 2001). In contrast, disturbance by avian and mammalian predators did not appear to trigger

306 hatchling emergence (but note that our nests were caged, and nest predator behaviour around  
307 uncaged and caged nests may differ, but see Riley and Litzgus, 2013). Overall, variation in  
308 overwintering strategy may be related to avoidance of a direct mortality threat from Sarcophagid  
309 fly larvae. Overwintering in-nest is thought to be the *de facto* strategy (Gibbons, 2013), and  
310 perhaps predation by fly larvae has triggered a plastic response of fall emergence and a  
311 subsequent alternative terrestrial or aquatic overwintering strategy.

312 Fall-emerging hatchlings were smaller than hatchlings that overwintered in-nest. This  
313 finding is in contrast to the idea that smaller hatchlings should remain in-nest because they likely  
314 have increased supercooling abilities (Costanzo et al., 2004). Ice nucleation occurs when water  
315 molecules form ice in an organism (Rasmussen and MacKenzie, 1973), and probability of ice  
316 nucleation increases with fluid volume (Vali, 1995). Our findings are supported by a recent study  
317 by Mitchell et al. (2014) that found survival overwinter was higher for larger hatchlings. There  
318 may be a size threshold at which hatchlings leave the nest in the fall to forage to build up  
319 energetic reserves prior to overwintering. Proxies for hatchling fitness (body condition and  
320 righting response) were not related to hatchling overwintering strategy, which contradicts the  
321 hypothesis that overwintering in-nest may be a *de facto* response to a lower developmental state  
322 (Costanzo et al., 2008).

323

### 324 **Maternal influence on overwintering strategy**

325 There may be some degree of parental influence on overwinter strategy, but overwintering  
326 strategy was not consistently associated with maternal identity. In our study, 4 out of 6 females'  
327 nest pairs exhibited the same overwinter strategy. In contrast, *P. rubriventris* nests oviposited by  
328 the same female did not exhibit the same overwinter strategy (Freibele and Swarth, 2005);  
329 however, their sample size was small (N=2). Perhaps *C. picta* overwintering strategy is  
330 paternally influenced; if clutches oviposited by the same mother have different fathers, their  
331 overwintering strategy may differ. Paternity was unknown in our study; however, *C. picta* first  
332 and second clutches can share paternity 97.5% of the time (McGuire et al., 2011). Overall, the  
333 low sample size (N=6) limits the inferences we can make regarding genetic influence on  
334 overwintering strategy.

335

### 336 **Comparison between aquatic and terrestrial overwintering environments**

337 Putative aquatic overwintering sites had higher winter temperatures than terrestrial nests. In  
338 Indiana, aquatic overwintering sites also experienced higher temperatures than nests (Costanzo et  
339 al., 2008). Winter temperatures were colder but more stable in natal nests. Marshes experienced  
340 more fluctuations in winter temperatures thus exposing hatchlings to potentially deleterious  
341 environmental extremes. In our study, some aquatic overwintering sites reached lethal minimum  
342 temperatures, but others did not even reach freezing temperatures during winter (Table 2).  
343 Exposure to temperature extremes increases mortality either by exposure to freezing  
344 temperatures or as a result of increased metabolic rate causing energy depletion and death  
345 (Greaves and Litzgus, 2007; Edge et al., 2009; Muir et al. 2013). Thus, in regards to temperature,  
346 natal nests pose less of a winter survival risk to hatchling *C. picta*.

347 More oxygen was available in nests than in marshes. Dissolved oxygen in marshes ranged  
348 from close to anaerobic (0% air saturation) to normoxic levels (above 80% air saturation);  
349 however, on average marsh oxygen was close to hypoxic levels (below 30% air saturation).  
350 Winter oxygen concentration in nests was consistently similar to the oxygen concentration of air  
351 (21.0% oxygen); thus, gas exchange is likely not a challenge to terrestrially overwintering  
352 hatchling turtles that breathe with their lungs. In contrast, gas exchange in aquatic sites presents a  
353 challenge during winter, especially because hatchlings have a lower anoxia tolerance compared  
354 to adults (Packard and Packard, 2004; Reese et al., 2004), and must rely on less-efficient  
355 cutaneous routes of gas exchange. Lower anoxia tolerance in hatchlings may itself be a driving  
356 factor in the prevalence of terrestrial overwintering by hatchling turtles (Gibbons, 2013).

357

### 358 **CONCLUSION**

359 Overwintering strategy of hatchling *C. picta* may be influenced by nest environmental factors.  
360 Smaller hatchlings were more likely to emerge from the nest in the fall, which may indicate that  
361 they use the fall to increase energy reserves prior to overwintering. Hatchlings were significantly  
362 smaller post-overwintering, which indicates that overwintering terrestrially may influence future  
363 survival. Yet, fitness consequences of dichotomous overwintering strategies are unknown, and  
364 more research is needed to understand the costs of overwintering aquatically versus terrestrially  
365 for hatchling turtles. Most notably, Sarcophagid fly larvae may be stimulating fall emergence,

366 such that hatchling overwintering strategy is associated with predator avoidance. Our study was a  
367 first step in elucidating the factors that cause within-population variation in a turtle species with  
368 a dichotomous hatchling overwinter strategy.

369

## 370 MATERIALS AND METHODS

### 371 **Study area**

372 The two study sites are in Algonquin Provincial Park, Ontario, Canada. The western site is  
373 located along the Highway 60 corridor west of the Wildlife Research Station (WRS, 45° 35' N,  
374 78° 30' W). The eastern site is 60 km northeast of the first (45° 87' N, -77° 77' W). Habitat at  
375 both sites consists of a mosaic of water bodies within forest (Edge et al., 2010). Elevations at the  
376 western site are higher (*ca.* 585 m above sea level) than at the eastern site (*ca.* 150 m above sea  
377 level), and consequently the first site experiences a colder and wetter climate (Ontario Ministry  
378 of Natural Resources, 1998). Nest data were pooled from both sites to address our study  
379 objectives.

380

### 381 **Field sampling**

#### 382 *Nest Site Monitoring*

383 Monitoring of nesting sites began when females started exhibiting nesting behaviours, and  
384 occurred from 20 May to 20 June in 2010, and from 5 June to 4 July in 2011. Nest sites were  
385 searched by researchers on foot from dawn (~5:00) to about 10:00, and in the afternoon from  
386 dusk (~17:00) until nesting activity ceased. Both first and second clutches were sampled; this  
387 allowed examination of maternal effects and whether overwinter strategy depends on oviposition  
388 date. Nest site monitoring ceased when three days elapsed continuously without nesting  
389 behaviours.

390 Nests were excavated after females completed oviposition. As eggs were removed, they  
391 were numbered using a pencil to ensure they were returned to the nest in the same order and  
392 orientation, and then placed in moist vermiculite in a plastic bin. After eggs were removed, nest  
393 cavities were filled with excavated nest cavity soil to prevent desiccation. Eggs were transported  
394 in a vehicle to a field lab at the western site, and measured in the field at the eastern site. Mass  
395 and dimensions of eggs were measured for a long-term study (R.J. Brooks, University of Guelph

396 and J.D. Litzgus, Laurentian University). Measuring occurred within 24 hours post-oviposition,  
397 prior to the vitteline membrane adhering to the shell surface (Yntema, 1968; Rafferty and Reina,  
398 2012), ensuring no trauma to developing embryos (Samson et al., 2007).

399 Eggs were reburied in the original nest cavity, with a waterproofed temperature data logger  
400 that recorded temperature hourly in the centre. Data loggers were either an iButton<sup>®</sup> (accuracy of  
401  $\pm 1^\circ\text{C}$  or  $0.5^\circ\text{C}$ ; Thermochron DS1921G; Dallas Semiconductor, Sunnyvale, CA), or a HOBO  
402 Stowaway<sup>®</sup> (accuracy of  $\pm 0.2^\circ\text{C}$ ; TidbiT TBI32-05+37; Onset Computer Corp., Bourne, MA).  
403 Data logger types and the waterproofing methods did not differ in temperature readings (Roznik  
404 and Alford, 2012; our data:  $F_{3, 2480}=2.01$ ,  $P=0.94$ ). Also, in 2011, a golf Wiffle<sup>®</sup> ball (4 cm  
405 diameter, Wiffle Ball Inc., Shelton, CT) with 30 cm of tubing (Tygon<sup>®</sup>, R-3603, Fisher  
406 Scientific, Whitby, ON) extending into the middle of the Wiffle<sup>®</sup> ball was buried in the centre of  
407 the nest cavity with tubing extending out of the ground. A two-way stop cock closed the tube  
408 from the environment. This system was used to measure oxygen in the nest (see below). Finally,  
409 each nest was covered by a wire cage to prevent depredation. Cages were made of 1 cm mesh  
410 hardware cloth, and were open-bottom cubes with dimensions of 30 x 30 x 40 cm with 8 cm  
411 flaps (Riley and Litzgus, 2013).

412

#### 413 *Nest Environment Monitoring*

414 In 2010, once per month from oviposition to October, and on the day of emergence,  
415 environmental variables were measured. In 2011, environmental variables were measured bi-  
416 weekly from oviposition to October, on the day of emergence, and monthly during winter  
417 (October to April). Environmental measurements were collected on: vegetation cover, soil  
418 moisture, nest slope, and oxygen. Vegetation cover was estimated by placing a 1-m<sup>2</sup> quadrat on  
419 the ground with the nest in the middle; percentage of bare ground, herbaceous plants, woody  
420 plants, and leaf litter within the quadrat were visually estimated (Wilson, 1998). Soil samples  
421 (~150 g) were collected 30 cm away from the nest at the same depth; the sample was held in a  
422 sealed glass bottle until measurement of soil moisture. Slope of the ground above the nest was  
423 measured using a level with a rotating vial (Fatmax<sup>®</sup> Xtreme Torpedo Level, 43-609, Stanley  
424 Tools Canada, Oakville, ON) angled towards the closest water body.



425 Nest oxygen was measured by drawing air out of the nest through the Wiffle<sup>®</sup> ball and tube  
426 system, and then through an oxygen sensor (S102 Flow-through Oxygen Sensor, Quibit Systems  
427 Inc., Kingston, ON) using a DC air pump (Garrett et al., 2010). The oxygen sensor was  
428 calibrated using ambient air prior to each measurement. Using volume of the average nest cavity  
429 (32 cm<sup>3</sup>), Wiffle<sup>®</sup> ball (17 cm<sup>3</sup>), and tubing (4 cm<sup>3</sup>), and the rate at which the DC air pump  
430 pulled oxygen from the nest (176 cm<sup>3</sup>/min), we estimated that the time for oxygen in the nest to  
431 reach the sensor was approximately 20 sec. Thus, the oxygen measurement at 30 sec was used in  
432 analysis, as we wanted to examine steady-state values.

433

#### 434 *Monitoring Nest Predator Interactions*

435 Nests were surveyed daily during nesting and hatching seasons for depredation attempts, and  
436 weekly in July and August (Burke et al., 1998; Kolbe and Janzen, 2002). A ‘depredation attempt’  
437 was recorded if substrate was cleared away from around the nest cage, and/or the nest cage was  
438 unearthed. After recording a depredation attempt, soil was replaced so that multiple attempts  
439 could be recorded (Riley and Litzgus, 2014).

440

#### 441 *Hatching Season Monitoring*

442 Hatchlings were collected and sampled during three periods: 1) natural fall emergence, 2)  
443 excavated in late fall from nests in which they would have remained overwinter, and 3) natural  
444 spring emergence. The demarcations of each period are described below.

445 Known incubation duration for painted turtles (Ernst and Lovich, 2009) was used to  
446 estimate emergence time at which time daily monitoring for fall emergence began. When a nest  
447 emerged, hatchlings and un-hatched eggs were collected and the presence or absence of  
448 Sarcophagid fly larvae within the nest was recorded (Chidester, 1915; Bolton et al., 2008). Data  
449 loggers were left in nests to record winter temperatures (see below).

450 A proportion of the un-emerged nests (N=11/61, 5 nests in 2010 and 6 in 2011) were  
451 excavated in late fall, and the hatchlings and un-hatched eggs were collected. Excavation  
452 occurred after daily mean air temperature dropped below 5°C for three consecutive days. In  
453 2010, nests were excavated from 1 to 4 October, and in 2011 nests were excavated from 2 to 7  
454 October. These hatchlings, if not excavated, would have likely overwintered in-nest as



455 temperatures had become too cool for emergence. These hatchlings were used in comparisons of  
456 body size and condition, as well as righting response (see below) between fall-emerging  
457 hatchlings and hatchlings preparing to overwinter in-nest.

458 In spring 2011, nests were monitored daily for spring emergence after mean air  
459 temperatures rose above freezing consistently (late-April to early-May). In spring 2012, nests  
460 were excavated from 6-10 April. Hatchlings and un-hatched eggs were collected, and probable  
461 cause and time of death for any dead hatchlings was noted - whether death occurred during  
462 incubation/overwinter and was due to freezing/energy depletion or destruction by roots and/or fly  
463 larvae. Hatchlings that died during winter due to freezing/energy depletion had little trauma and  
464 were not decomposed. Hatchlings that died during incubation because of plant roots were  
465 covered in root masses, and hatchlings that died because of fly larvae predation consisted of only  
466 skin and scutes. Hatchlings that died during incubation also were more decomposed (e.g., scutes  
467 flaking off, body parts rotten).

468

#### 469 *Hatchling Variables Measured*

470 Hatchling midline carapace and plastron lengths were measured to the nearest 0.01 mm (3148,  
471 Traceable Digital Calipers, Control Company, Friendswood, TX). Hatchling mass was measured  
472 using a digital scale (SP202, Scout Pro, Ohaus Corporation, Pine Brook, NJ) to the nearest 0.1 g.

473 Each hatchling underwent a righting test, which consisted of placing each hatchling on its  
474 carapace on a cloth-covered board (30 x 15 cm) and waiting for the turtle to flip over onto its  
475 plastron. Two variables were measured: (1) latency period (LP) which is time from placement  
476 until the first righting attempt, and (2) righting period (RP) which is time from first righting  
477 attempt until successful righting (Rasmussen and Litzgus, 2010; Riley and Litzgus, 2013).

478 Temperature in the lab was recorded for each trial (range 17 to 27°C). Each trial was recorded  
479 with a digital camera (Photosmart R742, Hewlett-Packard Development Company, Mississauga,  
480 ON), and LP and RP were scored from the videos. Turtles that cannot right themselves are more  
481 likely to be predated, to desiccate and/or drown (Finkler and Claussen, 1997). Thus, righting  
482 ability is considered to represent a hatchling's future survival (Freedberg et al., 2004; Delmas et  
483 al., 2007). Hatchlings were processed within 24 hours, and released at their nests.

484 During release, we examined if hatchling *C. picta* move to aquatic overwintering sites after  
485 fall emergence (Costanzo et al., 1995). In 2011, before release, fall-emerging hatchlings (N=85)  
486 were dusted with ultraviolet light-activated fluorescent powder (UV Phosphorus Powder,  
487 Singapore). We avoided contact with eyes, mouth, nostrils and cloaca (Stapp et al., 1994). At  
488 night, hatchling trails were tracked using hand-held UV lamps (Raytech Raytector 5, Model R5-  
489 FLS-2, Middletown, CT), and we recorded whether trails led towards or away from water during  
490 this first 24 hours.

491

#### 492 *Winter Environmental Monitoring*

493 Nest and aquatic overwintering environments were monitored from October 2011 to April 2012.  
494 Nest oxygen (using the method described above) was measured monthly. Temperature loggers  
495 recorded data hourly at a nest depth of 10 cm. Aquatic overwintering environment was  
496 monitored over the same period; firstly, by measuring dissolved oxygen (DO) content in the  
497 marshes (with overwintering adult turtles) adjacent to nests. DO was measured at a standardized  
498 water depth of 60 cm using a DO meter (accuracy of  $\pm 2\%$  air saturation; YSI 556 MPS, YSI  
499 Inc., Yellow Springs, OH). Data loggers recorded hourly temperatures at a depth of 10 cm within  
500 the marsh substrate at putative hatchling overwintering sites, and some known adult  
501 overwintering sites. Previous observations indicate that turtle hatchlings overwinter at a substrate  
502 depth of 2-15 cm within water bodies (Ultsch et al., 2007; Paterson et al., 2012). In total, 44 data  
503 loggers were placed in 12 marshes; from each marsh, 2-5 data loggers were retrieved in April  
504 2012.

505

#### 506 **Soil analyses**

507 Soil samples were used for several analyses: grain size, moisture and organic content. About 5 g  
508 of soil collected at oviposition and each environmental measurement period was weighed and  
509 then dried in an oven at 65°C within 24 hours post-collection. Dried samples were weighed and  
510 mass lost was recorded as soil moisture content. The remaining soil samples were transported to  
511 Laurentian University, Sudbury, ON and air-dried. For organic content analysis, empty crucibles  
512 were first weighed and then dried samples were sieved using a # 25 sieve, and ~5 g of soil was  
513 placed in each crucible. Crucibles were then re-weighed and placed in a muffle furnace. The

514 muffle furnace program consisted of increasing temperature by 0.7°C/min to a temperature of  
515 150°C, then temperature remained at 150°C for half an hour. The temperature was then increased  
516 by 0.3°C/min to 450°C where it remained for 2 hours. After 30 hours elapsed, crucibles were  
517 removed, cooled in a desiccator, and weighed a final time. The weight lost was recorded as  
518 organic content (Hughes et al., 2009).

519 Sieve analysis was used to determine soil grain size. The sieve sizes used were #8, #16,  
520 #30, #50, #100, and #200. Sieves were weighed individually, and placed in a stack. About 50 g  
521 of an air-dried soil sample was placed at the top of the stack, and put on a sieve shaker for 10  
522 min. Sieves were individually weighed again to determine the amount of soil retained in each  
523 (Soil Survey Division Staff, 1993; Hughes et al., 2009). The percentage of soil in each sieve out  
524 of the total amount of soil in the stack was calculated, and the Canadian Soil Survey Committee  
525 system was used to classify soil types: gravel ( $\geq 2$  mm grain diameter, percentage in #8 sieve),  
526 coarse sand (0.5–2 mm grain diameter, percentage in #16 and #30 sieves), sand (0.15–0.5 mm  
527 grain diameter, percentage in #50, #100, and #200 sieves), and fines ( $\leq 0.075$  mm grain  
528 diameter, percentage that had gone through the #200 sieve).

529

## 530 **Data handling and analyses**

### 531 *Summary Statistics*

532 To assess if oviposition date affected overwinter strategy, nesting dates were coded in annual  
533 numeric sequence (Wilimovsky, 1990). Hatching success (%) was calculated as the number of  
534 hatched eggs divided by the number of eggs laid. Hatchlings that were depredated by fly larvae  
535 or roots during incubation were included as hatched in this calculation. Overwintering success  
536 (%) was calculated as the number of hatchlings alive after winter divided by the number of live  
537 hatchlings in the nest pre-overwintering. Hatching and overwintering success were compared  
538 between hatchlings from fall and spring-emerging nests using a Mann-Whitney-Wilcoxon test  
539 (Gotelli and Ellison, 2004).

540 Nest temperature data were used to calculate total heat units ( $^{\circ}\text{D}$ ): a variable that relates  
541 both mean nest temperature and variation to embryonic development (Holt, 2000). Degree days  
542 ( $^{\circ}\text{D}$ ) are the number of heat units accumulated over 24 hours above a threshold temperature ( $T_0$ ).  
543 Below the threshold temperature, no development takes place, but above it development occurs

544 (Holt, 2000). The threshold temperature ( $T_0$ ) for painted turtles is 14°C (Les et al., 2007). The  
 545 equation uses hourly temperatures ( $T_0, T_1, T_2, \dots, T_{23}$ ) to calculate heat units above a threshold  
 546 temperature ( $T_0$ ; Holt, 2000).

547

$$548 \quad \text{HU} = [((T_0+T_1)/2)+((T_1+T_2)/2)+\dots+((T_{22}+T_{23})/2)]/(24-T_0) \quad (1)$$

549

550 Mean, minimum, and maximum nest temperatures, as well as the amount of time a nest  
 551 spent below -0.6°C (freezing point of body fluids for hatchlings; Packard and Packard, 2004) and  
 552 -4°C (lower limit for freeze tolerance; Storey et al., 1988) from October until April was  
 553 calculated to understand the nest environment to which hatchlings were exposed.

554

### 555 *Statistical Analyses*

556 All statistical analyses were performed in R (R Development Core Team, 2011). All data are  
 557 shown as means  $\pm$  1 standard error. A significance level of  $\alpha=0.05$  and 95% confidence limits  
 558 were utilized for all tests.

559 Environmental variables measured throughout incubation were averaged for each nest. A  
 560 principle component analysis (PCA) was used to transform 6 soil variables (percentage of soil  
 561 within each soil texture class, organic content, and moisture) into one principal component that  
 562 summarized 54% of variation within these variables (Manly, 2005). The maximal multivariate  
 563 logistic regression model examined the relationship between turtle overwinter strategy (a binary  
 564 response variable: spring=0, or fall emergence=1) and 8 environmental variables () considering  
 565 main effects only (due to our low sample size;  $N=22$  nests), and was fit using glm (Logan, 2010).  
 566 Variables were standardized (by subtracting each variable by its mean divided by 1 standard  
 567 deviation) for use in the models. Model ranking with  $AIC_c$  and averaging was completed using  
 568 the R packages glmulti (Calcagno and de Mazancourt, 2010) and MuMIn (Barton, 2009). To  
 569 assess model fit, we used Nagelkerke's R-square ( $R^2_N$ ; Nagelkerke, 1991), which is fitted by  
 570 maximum likelihoods, and generalizes traditional linear regression  $R^2$  to situations where  
 571 residual variance is not adequately defined (Nakagawa and Schielzeth, 2013).  $R^2_N$  is not sensitive  
 572 to the number of variables in the model, so  $AIC_c$  is used to identify the model that accounts for  
 573 the most variation in the data with the fewest variables.

574 Data on clutch oviposition sequence (i.e., first or second clutch for an individual mother)  
575 are count data (N=61); thus, a Fisher's Exact test was used to examine relationships between  
576 oviposition sequence and overwinter strategy (Gotelli and Ellison, 2004).

577 Predator presence, hatchling size, body condition and righting response were analyzed to  
578 determine if overwintering strategy might provide benefits to hatchlings (N=61 nests).  
579 Mammalian/avian predation attempts and Sarcophagid fly larvae presence data are count data, so  
580 data were analyzed using Fisher's Exact tests (Gotelli and Ellison, 2004). Hatchling variables  
581 were averaged across hatchlings for each clutch (Davy et al., 2014). Size, body condition and  
582 righting response were compared among hatchling sampling periods: fall-emerging hatchlings,  
583 hatchlings that were excavated in the fall, and spring-emerging. Assumptions of normality and  
584 heterogeneity of variance were verified, and data were transformed for normality as needed (see  
585 below). Carapace length and mass were compared among hatchling sampling periods using an  
586 ANOVA, and an *a posteriori* Tukey HSD that adjusted for multiple comparisons was used to  
587 identify differences among sample means (Logan, 2010). A logistic regression, fit using glm  
588 (Logan, 2010), examined the relationship between overwintering strategy (a binary response  
589 variable: spring=0, or fall emergence=1) and hatchling size (carapace length and mass). To  
590 examine body condition, a linear mixed effects model (LMEM) of mass against the fixed effects  
591 of carapace length and hatchling sampling period, and the random effect of mother's identity (to  
592 control for genetic effects) was used (Garcia-Berthou, 2001; Litzgus et al., 2008; Riley and  
593 Litzgus, 2013). Righting response variables (LP and RP) were transformed using  $\log(y+1)$  to  
594 ensure normality. LP and RP were compared among hatchling sampling periods using LMEMs  
595 that included the fixed covariate of trial temperature which is linearly related to ectotherm  
596 performance (Hutchison et al., 1966), and the random effect of mother's identity. LMEMs were  
597 performed using the R package lme4 (Bates, 2010). If a significant interaction was found in the  
598 LMEMs it was reported; if no significant interaction was found, only main effects were tested  
599 and reported.

600 To determine risks associated with aquatic versus terrestrial overwintering, winter  
601 temperatures were compared between marshes and nests using an unequal-variance Student's t-  
602 test. Nest temperature data were averaged from October 2011 until April 2012. Oxygen in-nest,  
603 and DO in marshes was averaged from September 2011 until April 2012. Oxygen data were not

604 compared statistically, as oxygen was measured in different media (water in marshes versus air  
605 in nests). Instead, oxygen data are described and compared qualitatively.

606

### 607 **Acknowledgements**

608 All work involving animals was carried out under an approved Laurentian University Animal  
609 Care Committee protocol (AUP # 2008-12-02) and was authorized by permits from the Ontario  
610 Ministry of Natural Resources. Thank you to the following people who assisted with fieldwork:  
611 M. Keevil, P. Moldowan, K. Hall, H. McCurdy-Adams, L. Monck-Whipp and staff and  
612 volunteers from the WRS.

613

### 614 **Competing interests**

615 The authors declare no competing financial interests.

616

### 617 **Author contributions**

618 J.L.R., G.J.T. and J.D.L. conceived and designed the experiments. J.L.R. performed the  
619 experiments and analyzed the data. J.L.R., G.J.T. and J.D.L. wrote the manuscript.

620

### 621 **Funding**

622 Financial support for this work was provided by the Natural Sciences and Engineering Research  
623 Council (NSERC; PGS-M scholarship to JLR and Discovery Grants to JDL and GJT), Canadian  
624 Wildlife Federation, Ontario Ministry of Natural Resources (OMNR), the Toronto Zoo, and  
625 Laurentian University. In-kind contributions were provided by Algonquin Provincial Park  
626 (OMNR) and the University of Guelph.

627

628 **References**

- 629 **Aars, J. and Ims, R. A.** (2002). Intrinsic and climatic determinants of population demography:  
630 the winter dynamics of tundra voles. *Ecology* **83**, 3449-3456.
- 631 **Altwegg, R., Dummermuth, S., Anholt, B. R., Flatt, T. and Benton, T.** 2005. Winter weather  
632 affects Asp Viper, *Vipera aspis*, population dynamics through susceptible juveniles. *Oikos*  
633 **110**, 55-66.
- 634 **Baker, P. J., Costanzo, J. P., Herlands, R., Wood, R. C. and Lee, Jr, R. E.** (2006).  
635 Inoculative freezing promotes winter survival in hatchling diamondback terrapin,  
636 *Malaclemys terrapin*. *Can. J. Zool.* **84**, 116-124.
- 637 **Barton, K.** (2009). MuMIn: multi-model inference. R package, version 0.12.2. Available at:  
638 <http://r-forge.r-project.org/projects/mumin/> .
- 639 **Bates, D.** (2010). Linear mixed model implementation in lme4. Package lme4 vignette, available  
640 at: <http://cran.r-project.org/web/packages/lme4/vignettes/Implementation.pdf>
- 641 **Baust, J. G., Grandee, R. and Condon, G.** (1979). The diversity of overwintering strategies  
642 utilized by separate populations of gall insects. *Physiol. Zool.* **52**, 572-580.
- 643 **Baust, J. G. and Lee, R. E. Jr.** (1981). Divergent mechanisms of frost-hardiness in two  
644 populations of the gall fly, *Eurosta solidaginsis*. *J. Insect Physiol.* **27**, 485-490.
- 645 **Blouin-Demers, G., Prior, K. A. and Weatherhead, P. J.** (2000). Patterns of variation in  
646 spring emergence by black rat snakes (*Elaphe obsoleta obsoleta*). *Herpetologica* **56**, 175-  
647 188.
- 648 **Bolton, S. M., Marshall, S. A. and Brooks, R. J.** (2008). Opportunistic exploitation of turtles  
649 eggs by *Tripanurga importuna* (Walker) (Diptera: Sarcophagidae). *Can. J. Zool.* **86**, 151-  
650 160.
- 651 **Brentcharlan, M.** (1989) Size and winter survivorship in neonatal western rattlesnakes  
652 (*Crotalus viridis*). *Can. J. Zool.* **67**, 1620-1625.
- 653 **Burke, V. J., Rathbun, S. L., Bodies, J. and Gibbons, J. W.** (1998). Effect of density on  
654 predation rate for turtle nests in a complex landscape. *Oikos* **83**, 3-11.
- 655 **Cagle, F. R.** (1954). Observations on the life cycles of painted turtles (Genus *Chrysemys*). *Am.*  
656 *Midl. Nat.* **52**, 225-235.



- 657 **Calcagno, V., and de Mazancourt, C.** (2010). glmulti: an R package for easy automated model  
658 selection with (generalized) linear models. *J. Stat. Software* **34**, 1-29.
- 659 **Carroll, D. M. and Ultsch, G. R.** (2007). Emergence season and survival in the nest of  
660 hatchling turtles in southcentral New Hampshire. *Northeast. Nat.* **2**, 307-310.
- 661 **Chidester, F. E.** (1915). Sarcophagid larvae from the painted turtle. *J. Parasitol.* **2**, 48-49.
- 662 **Christiansen, J. L. and Gallaway, B. J.** (1984). Raccoon removal, nesting success, and  
663 hatchling emergence in Iowa turtles with special reference to *Kinosternon flavescens*.  
664 *Southwest. Nat.* **29**, 343-348.
- 665 **Churchill, T. A. and Storey, K.B.** (1992). Natural freezing survival by painted turtles  
666 *Chrysemys picta marginata* and *C. picta belli*. *Am. J. Physiol.* **262**, R530-R537.
- 667 **Congdon, J. D., Pappas, M., Brecke, B. and Capps, J.** (2011). Conservation implications of  
668 initial orientation of naïve hatchling snapping turtles (*Chelydra serpentina*) and painted  
669 turtles (*Chrysemys picta belli*) dispersing from experimental nests. *Chel. Conserv. Biol.* **10**,  
670 42-53.
- 671 **Costanzo, J. P., Wright, M. F. and Lee Jr., R. E.** (1992). Freeze tolerance as an overwintering  
672 adaptation in Cope's grey treefrog (*Hyla chrysoscelis*). *Copeia* **1992**, 565-569.
- 673 **Costanzo, J. P., Iverson, J. B., Wright, M. F. and Lee Jr., R. E.** (1995). Cold hardiness and  
674 overwintering strategies of hatchlings in an assemblage of northern turtles. *Ecology* **76**,  
675 1772-1785.
- 676 **Costanzo, J. P., Litzgus, J. D., Iverson, J. B. and Lee Jr., R. E.** (1998). Soil hydric  
677 characteristics and environmental ice nuclei influence supercooling capacity of hatchling  
678 painted turtles *Chrysemys picta*. *J. Exp. Biol.* **201**, 3105-3112.
- 679 **Costanzo J. P., Litzgus, J. D., Iverson, J. B. and Lee Jr., R.E.** (2000). Ice nuclei in soil  
680 compromise cold hardiness of hatchling painted turtles, *Chrysemys picta*. *Ecology* **81**, 346-  
681 360.
- 682 **Costanzo J. P., Litzgus, J. D., Larson, J. L., Iverson, J. B. and Lee Jr., R. E.** (2001).  
683 Characteristics of nest soil, but not geographic origin, influence cold hardiness of hatchling  
684 painted turtles. *J. Thermal Biol.* **26**, 65-73.



- 685 **Costanzo, J. P., Dinklebacker, S. A., Iverson, J. B. and Lee Jr., R. E.** (2004). Physiological  
686 ecology of overwintering in the hatchling painted turtle: multiple-scale variation in  
687 response to environmental stress. *Physiol. Biochem. Zool.* **77**, 74-99.
- 688 **Costanzo, J. P., Lee Jr., R. E. and Ultsch, G. R.** (2008). Physiological ecology of  
689 overwintering in hatchling turtles. *J. Exp. Zool.* **309A**, 297-379.
- 690 **Davy, C. M., Paterson, J.E., Leifso, A. E.** (2014). When righting is wrong: performance  
691 measures require rank repeatability for estimates of individual fitness. *An. Behav.* **93**, 15-  
692 23.
- 693 **Delmas, V., Baudry, E., Girondot, M. and Prevot-Juilliard, A.** (2007). The righting response  
694 as a fitness index in freshwater turtles. *Biol. J. Linn. Soc.* **91**, 99-109.
- 695 **DePari, J. A.** (1996). Overwintering in the nest chamber by hatchling painted turtles, *Chrysemys*  
696 *picta*, in northern New Jersey. *Chel. Conserv. Biol.* **2**, 5-12.
- 697 **Edge, C. B., Steinberg, B. D., Brooks, R. J. and Litzgus, J. D.** (2009). Temperature and site  
698 selection by Blanding's turtles (*Emydoidea blandingii*) during hibernation near the species'  
699 northern range limit. *Can. J. Zool.* **87**, 825-834.
- 700 **Edge, C. B., Steinberg, B. D., Brooks, R. J. and Litzgus, J. D.** (2010). Habitat selection by  
701 Blanding's turtles (*Emydoidea blandingii*) in a relatively pristine landscape. *Écoscience* **17**,  
702 90-99.
- 703 **Ernst, C. H.** (1971). Population dynamics and activity cycles of *Chrysemys picta* in southeastern  
704 Pennsylvania. *J. Herpetol.* **5**, 151-160.
- 705 **Ernst, C. H. and Lovich, J. E.** (2009). Turtles of the United States and Canada, Second Edition.  
706 Baltimore: The Johns Hopkins University Press.
- 707 **Finkler, M. S. and Claussen, D. L.** (1997). Use of the tail in terrestrial locomotor activities of  
708 juvenile *Chelydra serpentina*. *Copeia* **1997**, 884-887.
- 709 **Finneran, L. C.** (1948). Reptiles of Branford, Connecticut. *Herpetologica* **4**, 123-132.
- 710 **Freedberg, S., Stumpf, A. L., Ewert, M. A. and Nelson, C. E.** (2004). Developmental  
711 environment has long-lasting effects on behavioural performance in two turtles with  
712 environmental sex determination. *Evol. Ecol. Res.* **6**, 739-747.
- 713 **Friebele, E. and Swarth, C. W.** (2005). Potential factors determining hatchling emergence  
714 patterns in red-bellied turtles (*Pseudemys rubriventris*). In *Proceedings of the 2005 Joint*

- 715 *Meeting of Ichthyologists and Herpetologists, Tampa, FL, 6-11 July 2005*. Tampa:  
716 American Society of Ichthyologists and Herpetologists.
- 717 **Garcia-Berthou, E.** (2001). On the misuse of residuals in ecology: testing regression residuals  
718 vs. the analysis of covariance. *J. An. Ecol.* **70**, 708-711.
- 719 **Garrett, K., Wallace, B. P., Garners, J. and Pladino, F. V.** (2010). Variations in leatherback  
720 turtle nest environments: consequences for hatching success. *End. Species Res.* **11**, 147-  
721 155.
- 722 **Graf, W. H.** (1984). *Hydraulics of sediment transport*. New York: McGraw-Hill Book Company.
- 723 **Gibbons, J. W.** (2013). A long-term perspective of delayed emergence (aka overwintering) in  
724 hatchling turtles: some they do and some they don't, and some you just can't tell. *J.*  
725 *Herpetol.* **47**, 203-214.
- 726 **Gibbons, J. W. and Nelson, D. H.** (1978). The evolutionary significance of delayed emergence  
727 from the nest by hatchling turtles. *Evolution* **32**, 297-303.
- 728 **Gillingwater, S. D.** (2001). A selective herpetofaunal survey, inventory, and biological research  
729 study of Rondeau Provincial Park. Unpublished report to Rondeau Provincial Park,  
730 Morpeth, Ontario.
- 731 **Gotelli, N. J. and Ellison, A. M.** (2004). *A primer of ecological statistics*. Sunderland: Sinauer  
732 Associates, Inc.
- 733 **Greaves, W. F. and Litzgus, J. D.** (2007). Overwintering ecology of wood turtles (*Glyptemys*  
734 *insculpta*) at the species' northern range limit. *J. Herpetol.* **41**, 32-40.
- 735 **Hartweg, N.** (1944). Spring emergence of painted turtle hatchlings. *Copeia* **1944**, 20-22.
- 736 **Holt, S. M.** (2000). Development and evaluation of a model for turtle embryonic growth. M.Sc.  
737 thesis, University of Guelph, Guelph, Ontario.
- 738 **Hughes, G. N., Greaves, W. F. and Litzgus, J. D.** (2009). Nest-site selection by wood turtles  
739 (*Glyptemys insculpta*) in a thermally limited environment. *Northeast. Nat.* **16**, 321-338.
- 740 **Hutchison, V. H., Vinegar, A. and Kosh, R. J.** (1966). Critical thermal maxima in turtles.  
741 *Herpetologica* **22**, 31-41.
- 742 **Huusko, A., Greenberg, L., Stickler, M., Linnansaari, T. Nykänen, M., Vehanen, T.**  
743 **Koljonen, S., Louhi, P. and Alfredsen, K.** (2007). Life in the ice lane: the winter ecology  
744 of stream salmonids. *River Res. Appl.* **23**, 469-491.

- 745 **Iverson, J. B. and Perry, R. E.** (1994). Sarcophagid fly parasitoidism on developing turtle  
746 eggs. *Herpetol. Rev.* **25**, 50-51.
- 747 **Jaeger, H. M., Liu, C. and Nagel, S. R.** (1989). Relaxation at the angle of repose. *Phys. Rev.*  
748 *Lett.* **62**, 40-43.
- 749 **Kolbe, J. J. and Janzen, F. J.** (2002). Spatial and temporal dynamic of turtle nest predation:  
750 edge effects. *Oikos* **99**, 538-544.
- 751 **Les, H. L., Paitz, R. T. and Bowden, R. M.** (2007). Experimental test of the effects of  
752 fluctuating incubation temperatures on hatchling phenotype. *J. Exp. Zool.* **307A**, 274-280.
- 753 **Litzgus, J. D., Bolton, F. and Schulte-Hostedde, A. I.** (2008). Reproductive output depends on  
754 body condition in spotted turtles (*Clemmys guttata*). *Copeia* **2008**, 86-92.
- 755 **Logan, M.** (2010). Biostatistical design and analysis using R, a practical guide. Chichester:  
756 Wiley-Blackwell.
- 757 **Lombardero, M. A., Ayres, M. P., Ayres, B. D. and Reeve, J. D.** (2000). Cold tolerance of  
758 four species of bark beetle (Coleoptera: Scolytidae) in North America. *Environ. Entomol.*  
759 **29**, 421-432.
- 760 **Lovich, J. E., Ernst, C. H., Ernst, E. M. and Riley J. L.** (in press). A 21 year study of seasonal  
761 and interspecific variation of hatchling emergence in a Nearctic freshwater turtle  
762 community: to overwinter or not to overwinter? *Herpetol. Monogr.*
- 763 **Macartney, J. M.** (1985). The ecology of the northern Pacific rattlesnake, *Crotalus viridis*  
764 *oreganus*, in British Columbia. M.Sc. thesis, University of Victoria, Victoria, British  
765 Columbia.
- 766 **Manly, B. F. J.** (2005). Multivariate statistical methods, a primer. New York: Chapman &  
767 Hall/CRC Press.
- 768 **Mann, T. M.** (1977). Impact of developed coastline on nesting and hatchling sea turtles in  
769 southeastern Florida. Unpubl. M.Sc. thesis, Florida Atlantic University, Boca Raton,  
770 Florida.
- 771 **Marchand, P. J.** (2013). Life in the cold: an introduction to winter ecology, 4<sup>th</sup> edition. New  
772 Hampshire: University Press of New England.
- 773 **McCaffery, R. M. and Maxellb, B. A.** (2010) Decreased winter severity increases viability of  
774 a montane frog population. *PNAS*, **107**, 8644-8649.

- 775 **McGuire, J. M., Congdon, J. D., Scribner, K. T. and Capps, J. D.** (2011). Variation in female  
776 reproductive quality and reproductive success of male midland painted turtles (*Chrysemys*  
777 *picta marginata*). *Can. J. Zool.* **89**, 1136-1145.
- 778 **Muchlinski, A. E.** (1988). Population attributes related to the life-history strategy of hibernating  
779 *Zapus hudsonius*. *J. Mammal.* **69**, 860-865.
- 780 **Muir, T. J., Dishong, B. D., Lee Jr, R. E. and Costanzo, J. P.** (2013). Energy use and  
781 management of energy reserves in hatchling turtles (*Chrysemys picta*) exposed to variable  
782 winter conditions. *J. Thermal Biol.* **38**, 324-330.
- 783 **Muldoon, K. A. and Burke, R. L.** (2012) Movements, overwintering, and mortality of hatchling  
784 Diamond-backed terrapins (*Malaclemys terrapin*) at Jamaica Bay, New York. *Can. J. Zool.*  
785 **90**, 651-662.
- 786 **Nakagawa, S., and Schielzeth, H.** (2013). A general and simple method for obtaining  $R^2$  from  
787 generalized linear mixed effects models. *Methods Ecol. Evol.* **4**, 133-142.
- 788 **Nagelkerke, N. J. D.** (1991). A note on a general definition of the coefficient of determination.  
789 *Biometrika* **78**, 691-692.
- 790 **Obbard, M. E. and Brooks, R. J.** (1981). Fate of overwintered clutches of the common  
791 snapping turtle (*Chelydra serpentina*) in Algonquin Park, Ontario. *Can. Field-Nat.* **95**,  
792 350-352.
- 793 **Ontario Ministry of Natural Resources.** (1998). Algonquin Provincial Park management plan.  
794 Ottawa: Queen's Printer for Ontario.
- 795 **Parker, W. S. and Brown W. S.** (1980). Comparative ecology of two colubrid snakes,  
796 *Masticophis t. taeniatus* and *Pituophis melanoleucas deserticola*, in northern Utah. *Milw.*  
797 *Public Mus. Contrib. Biol. Geol.* **7**, 1- 104.
- 798 **Paterson, J. E., Steinberg, B. D. and Litzgus, J. D.** (2012). Revealing a cryptic life-history  
799 stage: differences in habitat selection and survivorship between hatchlings of two turtle  
800 species at risk (*Glyptemys insculpta* and *Emydoidea blandingii*). *Wildl. Res.* **39**, 408-418.
- 801 **Packard, G. C. and Packard, M. J.** (1997). Type of soil affects survival by overwintering  
802 hatchlings of the painted turtle. *J. Thermal Biol.* **22**, 53-58.

- 803 **Packard, G. C. and Packard, M. J.** (2004). To freeze or not to freeze: adaptations for  
804 overwintering by hatchlings of the North American painted turtle. *J. Exp. Biol.* **207**, 2897-  
805 2906.
- 806 **Pappas, M. J., Brecke, B. J. and Congdon, J. D.** (2000). The Blanding's turtles (*Emydoidea*  
807 *blandingii*) of Weaver Dunes, Minnesota. *Chel. Conserv. Biol.* **3**, 557-568.
- 808 **Parren, S. G. and Rice, M. A.** (2004). Terrestrial overwintering of hatchling turtles in Vermont  
809 nests. *Northeast. Nat.* **11**, 229-233.
- 810 **Peach, W. J., Siriwardena, G. M. and Gregory, R. D.** 2003. Long-term changes in over-winter  
811 survival rates explain the decline of reed buntings, *Emberiza schoeniclus*, in Britain. *J.*  
812 *Appl. Ecol.* **36**, 798-899.
- 813 **Rafferty, A. R. and Reina, R. D.** (2012). Arrested embryonic development: a review of  
814 strategies to delay hatching in egg-laying reptiles. *J. Comp. Physiol. B: Biochem. Syst.*  
815 *Environ. Physiol.* **279**, 2299-2308.
- 816 **Rasmussen, M. L. and Litzgus, J. L.** (2010). Patterns of maternal investment in spotted turtles  
817 (*Clemmys guttata*): Implications of trade-offs, scales of analyses, and incubation substrates.  
818 *Écoscience* **17**, 47-58.
- 819 **Rasmussen, D.H. and Mackenzie, A. P.** (1973). Clustering in supercooled water. *J. Chem.*  
820 *Physics* **59**, 5003-5013.
- 821 **Reese, S. A., Ultsch, G. R. and Jackson, D. C.** (2004). Lactate accumulation, glycogen  
822 depletion, and shell composition of hatchling turtles under simulated aquatic hibernation. *J.*  
823 *Exp. Biol.* **207**, 2889-2895.
- 824 **Resetarits, W. J. Jr.** (1986). Ecology of cave use by the frog, *Rana palustris*. *Am. Midl. Nat.*  
825 **116**, 256-266.
- 826 **Riley, J. L. and Litzgus, J. D.** (2013). Evaluation of predator-exclusion cages used in turtle  
827 conservation: cost analysis and effects on nest environment and proxies of hatchling  
828 fitness. *Wildl. Res.* **40**, 499-511.
- 829 **Riley, J. L. and Litzgus, J. D.** (2014). Cues used by predators to detect freshwater turtle nests  
830 persist late into incubation. *Can. Field-Nat.* **128**: 179-188.
- 831 **Roznik, E. A. and Alford, R. A.** (2012). Does waterproofing Thermochron iButton dataloggers  
832 influence temperature readings? *J. Thermal Biol.* **37**, 260-264.

- 833 **Rozycki, C. B.** (1998). Reproductive and nesting ecology of the painted turtle (*Chrysemys picta*)  
834 in Acadia National Park, Mount Desert Island, Maine. M.Sc. thesis, Bard College,  
835 Annandale-On Hudson, New York, NY.
- 836 **Samson, J., Hughes, E. J. and Brooks, R. J.** (2007). Excavation is a nondeleterious method for  
837 obtaining fecundity and morphometric data from small-sized eggs of freshwater turtles.  
838 *Chel. Conserv. Biol.* **6**, 255-259.
- 839 **Schwarzkopf, L. and Brooks, R. J.** (1987). Nest-site selection and offspring sex ratio in painted  
840 turtles, *Chrysemys picta*. *Copeia* **1987**, 53-61.
- 841 **Sender, T. and Simon, M.** (2003). Population dynamics of the pipistrelle bat: effect of sex, age,  
842 and winter weather on seasonal survival. *J. An. Ecol.* **72**, 308-320.
- 843 **Soil Survey Division Staff.** (1993). Soil Survey Manual. Washington: Soil Conservation  
844 Service, US Department of Agriculture Handbook 18.
- 845 **Smith, K. A.** (2002). Demography and spatial ecology of wood turtles (*Clemmys insculpta*) in  
846 Algonquin Provincial Park. M.Sc. thesis, University of Guelph, Guelph, Ontario.
- 847 **Spencer, R. and Janzen, F. J.** (2011). Hatching behaviour in turtles. *Integr. Comp. Biol.* **51**,  
848 100-110.
- 849 **St. Clair, R. C. and Gregory, P. T.** (1990). Factors affecting the northern range limit of painted  
850 turtles (*Chrysemys picta*): winter acidosis or freezing? *Copeia* **1990**, 1083-1089.
- 851 **Stapp, P., Young, J. K., VandeWoude, S. and Van Horne, B.** (1994). An evaluation of the  
852 pathological effects of fluorescent powder on deer mice (*Peromyscus maniculatus*). *J.*  
853 *Mammal.* **75**, 704-709.
- 854 **Storey K. B, Storey, J. M., Brooks, S. P. J., Churchill, T. A. and Brooks, R. J.** (1988).  
855 Hatchling turtles survive freezing during winter hibernation. *PNAS* **85**, 8350-8354.
- 856 **Tanaka, K.** (1997). Evolutionary relationship between diapause and cold hardiness in the house  
857 spider, *Achaearanea tepidariorum* (Araneae: Theridiidae). *J. Insect Physiol.* **43**, 271-274.
- 858 **Tester, J. R. and Breckenridge, W. J.** (1964). Populations dynamics of the Manitoba toad,  
859 *Bufo hemiophrys*, in northwestern Minnesota. *Ecology* **45**, 592-601.
- 860 **Tinkle D. W., Congdon, J. D. and Rosen, P. C.** (1981). Nesting frequency and success:  
861 implications for the demography of painted turtles. *Ecology* **62**, 1426-1432.

- 862 **Ultsch, G. R.** (2006). The ecology of overwintering among turtles: where turtles overwinter and  
863 its consequences. *Biol. Rev.* **81**, 339-367.
- 864 **Ultsch, G. R., Draud, M. and Wicklow, B.** (2007). Post-emergence movements and  
865 overwintering of snapping turtle, *Chelydra serpentina*, hatchlings in New York and New  
866 Hampshire. *Can. Field-Nat.* **121**, 178-181.
- 867 **Vali, G.** (1995). Principles of ice nucleation. Pp. 1-28 in R.E. Lee, Jr., G. J. Warren, and L.V.  
868 Gusta, eds. *Biological Ice Nucleation and its Applications*. St. Paul: American  
869 Phytopathological Society.
- 870 **Viitanen, P.** 1967. Hibernation and seasonal movements of the viper, *Vipera berus berus* (L.), in  
871 southern Finland. *Ann. Zool. Fenn.* **4**, 472-546.
- 872 **Warner, D. A. and Mitchell, T. S.** (2013). Does maternal oviposition site influence offspring  
873 dispersal to suitable habitat? *Oecologia* **172**, 679-688.
- 874 **Warkentin, K. M.** (1995). Adaptive plasticity in hatching age: a response to predation risk  
875 trade-offs. *PNAS* **92**, 3507-3510.
- 876 **Waye H. L. and Gillies, C.** (1999). *Chrysemys picta bellii* (Western painted turtle). Early  
877 emergence. *Herpetol. Rev.* **30**, 94-95.
- 878 **Wilimovsky, N. J.** (1990). Misuses of the term 'Julian Day'. *Trans. Am. Fish. Soc.* **119**: 162.
- 879 **Wilson, D. S.** (1998). Nest-site selection: microhabitat variation and its effects on the survival of  
880 turtle embryos. *Ecology* **79**, 1884-1892.
- 881 **Wood, D. W. and Bjorndal, K. A.** (2000). Relation of temperature, moisture, salinity, and slope  
882 to nest site selection in loggerhead sea turtles. *Copeia* **2000**, 119-119.
- 883 **Woolverton, E.** (1961). Winter survival of hatchling painted turtles in northern Minnesota.  
884 *Copeia* **1963**, 569-570.
- 885 **Yntema, C. L.** (1968). A series of stages in the embryonic development of *Chelydra serpentina*.  
886 *J. Morphol.* **125**, 219-251.
- 887



888 **Table 1. Environmental variables measured during the summer of 2011 that were**  
 889 **included in the logistic regression model to examine whether environment**  
 890 **influences overwintering strategy used by painted turtle (*Chrysemys picta*)**  
 891 **hatchlings. Mean  $\pm$  standard error (SE) of each environmental variable for fall and**  
 892 **spring-emerging nests (non-standardized values).**

| Variable                | Description                                                                                                                                                          | Mean $\pm$ SE      |                    |
|-------------------------|----------------------------------------------------------------------------------------------------------------------------------------------------------------------|--------------------|--------------------|
|                         |                                                                                                                                                                      | Fall-emerging      | Spring-emerging    |
| <i>date.laid</i>        | Date of oviposition translated to date during the calendar year                                                                                                      | 166 $\pm$ 8        | 165 $\pm$ 8        |
| <i>nest.depth</i>       | Depth to bottom of nest cavity (cm)                                                                                                                                  | 9.6 $\pm$ 1.6      | 10.0 $\pm$ 1.3     |
| <i>total.hatch</i>      | Number of hatchlings within a clutch                                                                                                                                 | 7 $\pm$ 2          | 6 $\pm$ 2          |
| <i>total.heat.units</i> | Heat units ( $^{\circ}$ D) calculated using hourly trapezoid method                                                                                                  | 3958.3 $\pm$ 414.5 | 3846.0 $\pm$ 417.4 |
| <i>avg.oxy</i>          | Percent oxygen in nest cavity measured in July, August and September                                                                                                 | 21.0 $\pm$ 0.1     | 21.1 $\pm$ 0.1     |
| <i>slope</i>            | Slope ( $^{\circ}$ ) of ground surface at nest. Negative values indicate a downward slope towards water, and positive values indicate an upward slope towards water. | -5.3 $\pm$ 8.7     | 2.3 $\pm$ 7.7      |
| <i>soil.pcl</i>         | First principal component for nest soil moisture and texture characteristics from PCA.                                                                               | -1.2 $\pm$ 2.2     | -0.3 $\pm$ 2.1     |
| <i>avg.bare.grnd</i>    | Percent bare ground in 1 m <sup>2</sup> quadrat around nest measured in June, July, August and September                                                             | 73.5 $\pm$ 9.7     | 80.6 $\pm$ 13.4    |

893



894 **Table 2. Thermal environment of painted turtle (*Chrysemys picta*) nests (N=19)**  
 895 **from October to April 2010-2011 and 2011-2012.** Mean  $\pm$  standard error (SE) nest  
 896 temperature, the range of minimum and maximum temperatures, and the number of  
 897 nests that spent time below  $-0.6^{\circ}\text{C}$  (freezing point of body fluids for hatchling turtles) and  
 898  $-4^{\circ}\text{C}$  (lower limit for freeze tolerance) summarized for fall-emerging and spring-emerging  
 899 nests.  
 900

| Thermal Characteristics ( $^{\circ}\text{C}$ )   | Fall-emerging<br>(N=6) | Spring-emerging<br>(N=13) |
|--------------------------------------------------|------------------------|---------------------------|
| Mean temperature                                 | $2.82 \pm 0.16$        | $1.91 \pm 0.13$           |
| Minimum temperature range                        | -4.84 to -2.33         | -4.91 to 1.67             |
| Maximum temperature range                        | 20.68 to 38.27         | 15.78 to 25.42            |
| Percentage of nests below $-0.6^{\circ}\text{C}$ | 100                    | 83                        |
| Percentage of nests below $-4^{\circ}\text{C}$   | 100                    | 31                        |

901

902 **Table 3. Top ten multiple logistic regression models that examined how environmental variables affect**  
 903 **overwintering strategy in hatchling painted turtles (*Chrysemys picta*).** The models were identified by their  $AIC_c$   
 904 scores. The model parameters, number of parameters ( $k$ ), log-likelihood of parameters ( $LL$ ), Nagelkerke's R-squared  
 905 ( $R^2_N$ ),  $AIC_c$ , delta  $AIC_c$ , and model weights ( $w_i$ ) are all shown.

906

| Model                                                     | $k$ | $LL$   | $R^2_N$ | $AIC_c$ | Delta $AIC_c$ | $w_i$ |
|-----------------------------------------------------------|-----|--------|---------|---------|---------------|-------|
| avg.bare.grnd + nest.slope                                | 2   | -11.55 | 0.41    | 30.36   | 0             | 0.18  |
| soil.pc1 + avg.bare.grnd + nest.slope                     | 3   | -10.29 | 0.51    | 30.81   | 0.45          | 0.14  |
| avg.oxy + nest.slope                                      | 2   | -11.93 | 0.38    | 31.12   | 0.76          | 0.12  |
| nest.slope                                                | 1   | -13.27 | 0.26    | 31.14   | 0.79          | 0.12  |
| avg.bare.grnd + total.heat.units + nest.slope + date.laid | 4   | -8.92  | 0.60    | 31.38   | 1.02          | 0.11  |
| avg.bare.grnd + avg.oxy + nest.slope                      | 3   | -10.82 | 0.47    | 31.86   | 1.5           | 0.08  |
| soil.pc1 + nest.slope                                     | 2   | -12.31 | 0.35    | 31.89   | 1.53          | 0.08  |
| avg.bare.grnd + total.heat.units + nest.slope             | 3   | -10.93 | 0.46    | 32.08   | 1.73          | 0.08  |
| total.heat.units + nest.slope                             | 2   | -12.88 | 0.30    | 33.02   | 2.67          | 0.05  |
| (null)                                                    | 0   | -15.75 | 0       | 33.68   | 3.32          | 0.03  |

907 **Table 4. Number of spring and fall-emerging painted turtle (*Chrysemys picta*)**  
908 **nests with Sarcophagid fly larvae present in the nest cavity.** Larvae presence was  
909 significantly related to hatchling overwintering strategy ( $P=0.04$ ).  
910

| Presence of Sarcophagid<br>Fly Larvae | Fall-emerging Nests<br>(N=18) | Spring-emerging Nests<br>(N=43) |
|---------------------------------------|-------------------------------|---------------------------------|
| Present                               | 9                             | 10                              |
| Not Present                           | 9                             | 33                              |

911

912

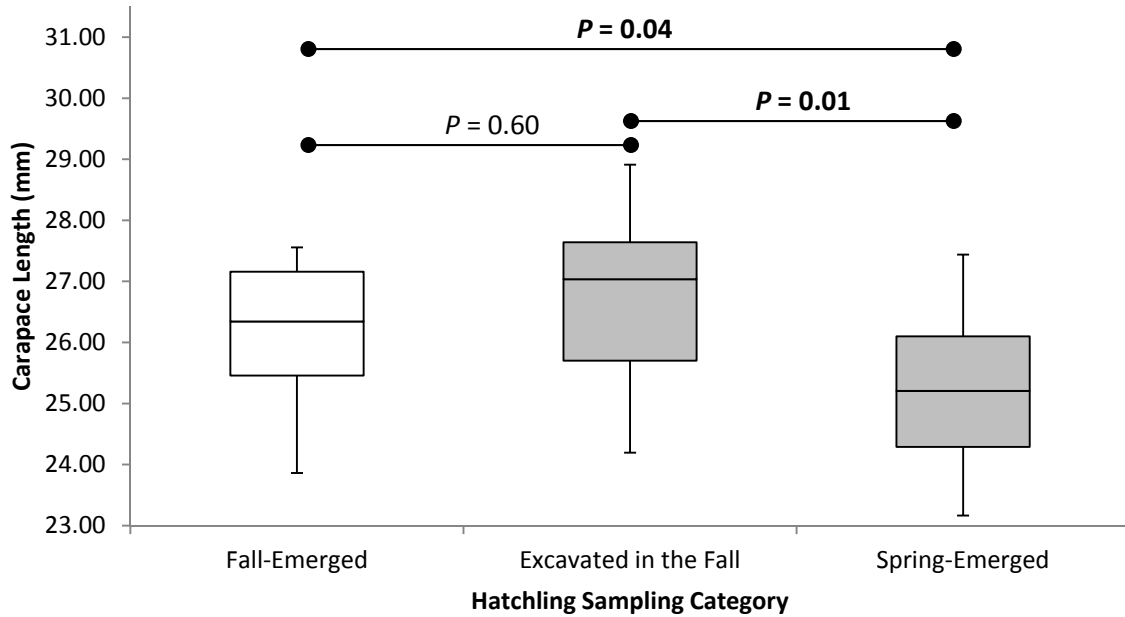

913

914

915

916

917

918

919

920

921

922

923

**Fig. 1. Carapace lengths of hatchling painted turtles (*Chrysemys picta*) that emerged in the fall (white box-plot) and of hatchlings that overwintered in-nest (grey box-plots) split into two groups: hatchlings excavated from nests in the fall, and those that overwintered in-nest and were measured after natural emergence in the spring. Carapace length of hatchlings influenced overwintering strategy. In the fall, small hatchlings were more likely to emerge from their nests (Wald's z-statistic=2.35,  $P=0.02$ ,  $R^2_N=0.21$ ). Post-overwintering, spring-emerging hatchlings were significantly smaller than hatchlings in the fall preparing to overwinter in-nest ( $F_{2,48}=5.83$ ,  $P<0.01$ ; Tukey HSD values displayed on the figure). This indicates that overwintering had consequences that could impact hatchling survival.**
